# Supplementary material
Source: Springer Nature journal article supplement (https://www.springermedizin.de/resource/supplementary/12890_2013_656_MOESM1_ESM.pdf/9505604)

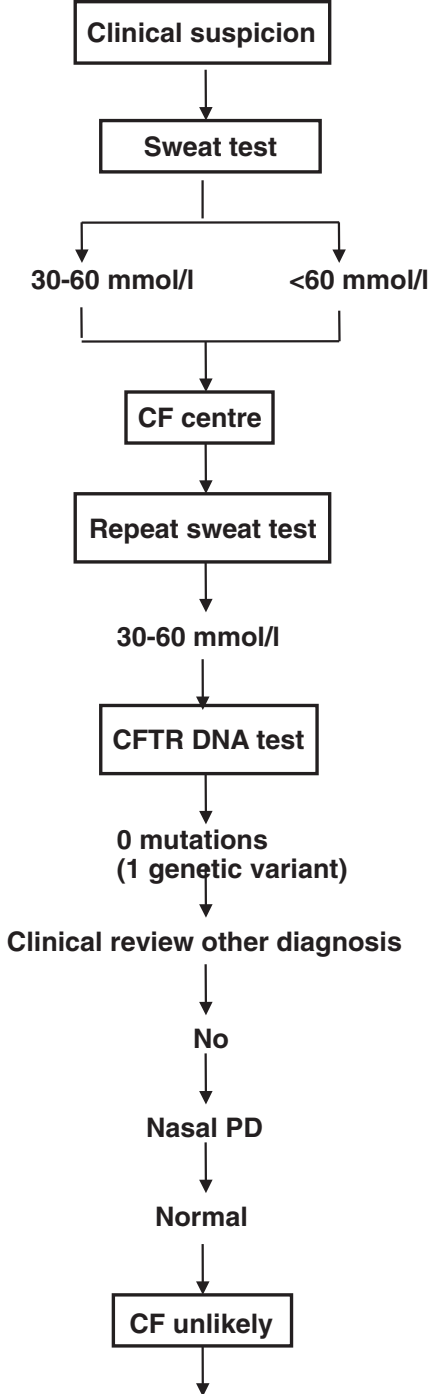

**Consider alternative diagnosis  
Appropriate investigations and follow-up**

Supplement: MOESM1 [file 9505604]
